# Supplementary material for: A widely distributed diheme enzyme from Burkholderia that displays an atypically stable bis-Fe(IV) state
Source: PubMed Central journal article supplement (PMC6405878; doi:10.1038/s41467-019-09020-4), 2019-03-07
Supplement: 41467_2019_9020_MOESM1_ESM.pdf [file 41467_2019_9020_MOESM1_ESM.pdf]

Supplementary Information

**A widely distributed diheme enzyme from *Burkholderia* that displays an atypically stable *bis*-Fe(IV) state**

K.Rizzolo, *et al.*

**Supplementary Table 1 | List of Proteins from Cluster IIIb of CCP-MauG SSN (Figure 1)**

| <b>Uniprot ID of Represented Protein</b> | <b>Sequences with 80% ID to Represented Protein</b> | <b>Protein Description</b>                                   | <b>Organism of Represented Protein</b>          |
|------------------------------------------|-----------------------------------------------------|--------------------------------------------------------------|-------------------------------------------------|
| A0A0D6MWK0_ACEA                          | 1                                                   | Cytochrome c peroxidase/methylamine utilization protein MauG | <i>Acetobacter aceti</i> NBRC 14818.            |
| A0A0D6N3U1_9PRO                          | 11                                                  | Cytochrome c peroxidase/methylamine utilization protein MauG | <i>Acetobacter cibinongensis</i> 4H-1.          |
| A0A0D6N6R1_9PRO                          | 1                                                   | Cytochrome c peroxidase/methylamine utilization protein MauG | <i>Acetobacter cibinongensis</i> 4H-1.          |
| A0A0D6NC10_9PRO                          | 1                                                   | Cytochrome c peroxidase/methylamine utilization protein MauG | <i>Acetobacter indonesiensis</i> 5H-1.          |
| A0A0D6NJQ1_9PRO                          | 1                                                   | Cytochrome c peroxidase/methylamine utilization protein MauG | <i>Acetobacter orientalis</i> 21F-2.            |
| A0A149U3E6_9PRO                          | 6                                                   | Methylamine utilization protein MauG                         | <i>Acetobacter senegalensis</i> .               |
| C1F330_ACIC5                             | 1                                                   | Di-heme cytochrome c peroxidase family protein               | <i>Acidobacterium capsulatum</i>                |
| A0A0D6PDH8_9PRO                          | 1                                                   | Cytochrome c peroxidase/methylamine utilization protein MauG | <i>Acidocella aminolytica</i> 101 = DSM 11237.  |
| K5ZFG9_9PROT                             | 1                                                   | Di-heme cytochrome c peroxidase                              | <i>Acidocella</i> sp. MX-AZ02.                  |
| A0A023D3H4_ACIM                          | 1                                                   | Cytochrome c peroxidase/methylamine utilization protein MauG | <i>Acidomonas methanolica</i> NBRC 104435.      |
| F0Q4Y4_ACIAP                             | 1                                                   | Di-heme cytochrome c peroxidase                              | <i>Acidovorax avenae</i>                        |
| F0QAT2_ACIAP                             | 1                                                   | Di-heme cytochrome c peroxidase                              | <i>Acidovorax avenae</i>                        |
| A0A109CSF0_AGRV                          | 2                                                   | Cytochrome C peroxidase                                      | <i>Agrobacterium vitis</i>                      |
| A0A0N0GLI5_9NEI                          | 1                                                   | Methylamine utilization protein MauG                         | <i>Amantichitium ursilacus</i> .                |
| A0A0N0XLQ4_9NEI                          | 1                                                   | Methylamine utilization protein MauG                         | <i>Amantichitium ursilacus</i> .                |
| A0A0A0DZ07_9BUR                          | 1                                                   | Uncharacterized protein                                      | <i>Aquabacterium</i> sp. NJ1.                   |
| A0A0F3KTY3_9NEI                          | 1                                                   | Cytochrome C peroxidase                                      | <i>Aquitalea magnusonii</i> .                   |
| A0A060QK26_9PRO                          | 2                                                   | Methylamine utilization protein mauG                         | <i>Asaia platycodi</i> SF2.1.                   |
| B2IBY9_BEI19                             | 1                                                   | Di-haem cytochrome c peroxidase                              | <i>Beijerinckia indica</i> subsp. <i>indica</i> |
| A0A0N1LDS2_9PRO                          | 1                                                   | Cytochrome C peroxidase                                      | <i>beta proteobacterium</i> AAP99.              |
| A0A157L0J1_9BOR                          | 1                                                   | Methylamine utilization protein MauG                         | <i>Bordetella ansorpii</i> .                    |
| A0A157S5C2_9BOR                          | 1                                                   | Methylamine utilization                                      | <i>Bordetella ansorpii</i> .                    |

|                   |    |                                                |                                               |
|-------------------|----|------------------------------------------------|-----------------------------------------------|
|                   |    | protein MauG                                   |                                               |
| A0A0S1Y7M8_9BOR   | 1  | Cytochrome C peroxidase                        | <i>Bordetella sp. N.</i>                      |
| A0A0E4BLV6_9BRA   | 13 | Putative methylamine utilization protein       | <i>Bradyrhizobium diazoefficiens.</i>         |
| A0A109K5R8_9BRA   | 2  | Cytochrome C peroxidase                        | <i>Bradyrhizobium sp. BR 10303.</i>           |
| H0TPH0_9BRAD      | 1  | Uncharacterized protein                        | <i>Bradyrhizobium sp. STM 3843.</i>           |
| A0A109EDF1_9BUR   | 85 | Cytochrome B6                                  | <i>Burkholderia cenocepacia.</i>              |
| A0A104JEQ1_BURG   | 3  | Cytochrome-c peroxidase                        | <i>Burkholderia gladioli</i>                  |
| A0A124UDP2_BURG   | 1  | Cytochrome-c peroxidase                        | <i>Burkholderia gladioli</i>                  |
| C5A8I0_BURGB      | 3  | Di-haem cytochrome c peroxidase                | <i>Burkholderia glumae (strain BGR1)</i>      |
| A0A149PUI4_9BUR   | 1  | Cytochrome-c peroxidase                        | <i>Burkholderia monticola.</i>                |
| A0A0H3KDX0_BURM   | 56 | Cytochrome c peroxidase                        | <i>Burkholderia multivorans</i>               |
| A0A0H3KUU2_BURM   | 69 | Cytochrome c peroxidase                        | <i>Burkholderia multivorans</i>               |
| B9B7J8_9BURK      | 10 | Di-heme cytochrome c peroxidase                | <i>Burkholderia multivorans CGD1</i>          |
| A8EKP1_BURPE      | 35 | Di-haem Cytochrome c peroxidase family protein | <i>Burkholderia pseudomallei 406e</i>         |
| A0A104NQQ1_BURP   | 1  | Cytochrome-c peroxidase                        | <i>Burkholderia pyrrocinia</i>                |
| D5WLT6_BURSC      | 1  | Di-hem cytochrome c peroxidase                 | <i>Burkholderia sp. (strain CCGE1002)</i>     |
| E8YKH7_9BURK      | 4  | Di-heme cytochrome c peroxidase                | <i>Burkholderia sp. CCGE1001</i>              |
| B5WFS1_9BURK      | 1  | Di-heme cytochrome c peroxidase                | <i>Burkholderia sp. H160.</i>                 |
| B5WQ61_9BURK      | 1  | Di-heme cytochrome c peroxidase                | <i>Burkholderia sp. H160.</i>                 |
| A0A0Q5P3D2_9BUR   | 3  | Cytochrome C peroxidase                        | <i>Burkholderia sp. Leaf177.</i>              |
| A0A0Q5P3K4_9BUR   | 5  | Cytochrome C peroxidase                        | <i>Burkholderia sp. Leaf177.</i>              |
| A0A060P5A7_9BUR   | 22 | Di-heme cytochrome c peroxidase                | <i>Burkholderia sp. RPE67.</i>                |
| A0A060P964_9BUR   | 6  | Putative cytochrome c peroxidase               | <i>Burkholderia sp. RPE67.</i>                |
| A0A103DWF2_9BUR   | 1  | Cytochrome-c peroxidase                        | <i>Burkholderia sp. TSV85.</i>                |
| Q2T6B0_BURTA BthA | 51 | Cytochrome c family protein                    | <i>Burkholderia thailandensis</i>             |
| A0A104RBB5_9BUR   | 24 | Cytochrome-c peroxidase                        | <i>Burkholderia ubonensis.</i>                |
| Q13JY9_BURXL      | 3  | Putative cytochrome c peroxidase               | <i>Burkholderia xenovorans (strain LB400)</i> |
| Q13W88_BURXL      | 4  | Putative Di-haem cytochrome c peroxidase       | <i>Burkholderia xenovorans (strain LB400)</i> |
| A0A0F0FD14_9BUR   | 3  | Cytochrome C peroxidase                        | <i>Burkholderiaceae bacterium 16.</i>         |
| A0A0F0FEE1_9BUR   | 4  | Cytochrome B6                                  | <i>Burkholderiaceae bacterium 16.</i>         |
| A0A0L0MAG6_9BUR   | 1  | Methylamine utilization protein mauG           | <i>Candidatus Burkholderia verschuerenii.</i> |

|                 |   |                                                                              |                                                   |
|-----------------|---|------------------------------------------------------------------------------|---------------------------------------------------|
| A0A0L0M7K8_9BUR | 1 | Cytochrome c peroxidase                                                      | <i>Candidatus Paraburkholderia schumanniana</i> . |
| Q7NSA0_CHRVO    | 3 | Uncharacterized protein<br> Cytochrome C peroxidase                          | <i>Chromobacterium violaceum</i>                  |
| A0A0A1FG20_9BUR | 3 | Methylamine utilization protein mauG                                         | <i>Collimonas arenae</i>                          |
| A0A0A1F439_9BUR | 3 | Methylamine utilization protein mauG                                         | <i>Collimonas arenae</i> .                        |
| A0A0A1F463_9BUR | 1 | Methylamine utilization protein mauG                                         | <i>Collimonas arenae</i> .                        |
| A0A127QD26_9BUR | 1 | Di-heme cytochrome c peroxidase family protein                               | <i>Collimonas arenae</i> .                        |
| A0A127P5G6_9BUR | 5 | Cytochrome c family protein                                                  | <i>Collimonas fungivorans</i> .                   |
| A0A127QBC7_9BUR | 3 | Cytochrome c family protein  Cytochrome c peroxidase                         | <i>Collimonas pratensis</i> .                     |
| A0A127QU57_9BUR | 4 | Cytochrome c family protein                                                  | <i>Collimonas pratensis</i> .                     |
| D0IYM5_COMT2    | 1 | Di-heme cytochrome c peroxidase                                              | <i>Comamonas testosteroni (strain CNB-2)</i>      |
| H1S6U9_9BURK    | 1 | Cytochrome c peroxidase                                                      | <i>Cupriavidus basilensis OR16</i> .              |
| H1SF75_9BURK    | 1 | Di-heme cytochrome c peroxidase                                              | <i>Cupriavidus basilensis OR16</i> .              |
| Q1LCG2_CUPMC    | 3 | Di-heme cytochrome c peroxidase                                              | <i>Cupriavidus metallidurans</i>                  |
| A0A132HAZ6_9BUR | 3 | Methylamine utilization protein MauG                                         | <i>Cupriavidus metallidurans</i> .                |
| A0A069ICH9_9BUR | 1 | Cytochrome C peroxidase                                                      | <i>Cupriavidus sp. SK-3</i> .                     |
| A0A022G295_9BUR | 1 | Diacylglycerol kinase                                                        | <i>Cupriavidus sp. SK-4</i> .                     |
| A0A059IPA0_9RHO | 1 | Cytochrome C peroxidase                                                      | <i>Defluviimonas sp. 20V17</i> .                  |
| K2IG95_9GAMM    | 1 | Di-heme cytochrome C peroxidase                                              | <i>Gallaecimonas xiamenensis 3-C-1</i> .          |
| A9HNB2_GLUUDA   | 1 | Di-heme cytochrome c peroxidase                                              | <i>Gluconacetobacter diazotrophicus</i>           |
| F3S881_9PROT    | 4 | Methylamine utilization protein mauG                                         | <i>Gluconacetobacter sp. SXCC-1</i> .             |
| G6XL93_9PROT    | 1 | Putative di-heme cytochrome c peroxidase                                     | <i>Gluconobacter morbifer G707</i> .              |
| Q5FS76_GLUOX    | 5 | Putative di-haem cytochrome c peroxidase                                     | <i>Gluconobacter oxydans (strain 621H)</i>        |
| M9MLY8_GLUTH    | 9 | Di-heme cytochrome c peroxidase/oxidase/methylamine utilization protein MauG | <i>Gluconobacter thailandicus NBRC 3255</i> .     |
| A0A0K2BCF9_9BUR | 2 | Cytochrome C peroxidase                                                      | <i>Herbaspirillum hiltneri N3</i> .               |
| A0A0C2BUW6_9BUR | 1 | Cytochrome C peroxidase                                                      | <i>Herbaspirillum sp. TSA66</i> .                 |
| A0A0A0D6J4_9PRO | 1 | Cytochrome C peroxidase                                                      | <i>Inquilingus limosus MP06</i> .                 |
| L9PA62_9BURK    | 1 | Methylamine utilization protein mauG                                         | <i>Janthinobacterium sp. HH01</i> .               |
| L9PNT8_9BURK    | 1 | Di-heme cytochrome c peroxidase                                              | <i>Janthinobacterium sp. HH01</i> .               |

|                 |   |                                                              |                                                                                                             |
|-----------------|---|--------------------------------------------------------------|-------------------------------------------------------------------------------------------------------------|
| A0A0M2WE15_9BUR | 4 | Methylamine utilization protein MauG                         | <i>Janthinobacterium sp. KBS0711.</i>                                                                       |
| A0A0M2WL29_9BUR | 1 | Methylamine utilization protein MauG                         | <i>Janthinobacterium sp. KBS0711.</i>                                                                       |
| A0A0D6PZR2_KOME | 3 | Cytochrome c peroxidase/methylamine utilization protein MauG | <i>Komagataeibacter europaeus NBRC 3261.</i>                                                                |
| G2I3E1_KOMMN    | 1 | Methylamine utilization protein MauG                         | <i>Komagataeibacter medellinensis</i>                                                                       |
| A0A0L8B0L9_9BUR | 1 | Uncharacterized protein                                      | <i>Limnohabitans planktonicus II-D5.</i>                                                                    |
| A0A0N7J9Y7_9BUR | 1 | Methylamine utilization protein MauG                         | <i>Limnohabitans sp. 103DPR2.</i>                                                                           |
| A0A0Q7XTP1_9BUR | 1 | Cytochrome B6                                                | <i>Massilia sp. Root1485.</i>                                                                               |
| A0A0Q6TR34_9BUR | 1 | Cytochrome C peroxidase                                      | <i>Massilia sp. Root335.</i>                                                                                |
| G6YIR1_9RHIZ    | 1 | Di-heme cytochrome c peroxidase                              | <i>Mesorhizobium amorphae CCNWGS0123.</i>                                                                   |
| A0A090E4R3_9RHI | 9 | Di-heme cytochrome c peroxidase                              | <i>Mesorhizobium sp. ORS3324.</i>                                                                           |
| A0A0Q6MTS8_9RHI | 2 | Cytochrome C peroxidase                                      | <i>Mesorhizobium sp. Root102.</i>                                                                           |
| A0A0Q8KKP4_9RHI | 2 | Cytochrome C peroxidase                                      | <i>Mesorhizobium sp. Root172.</i>                                                                           |
| B8EKA3_METSB    | 1 | Di-heme cytochrome c peroxidase                              | <i>Methylocella silvestris</i>                                                                              |
| J7Q4U5_METSZ    | 1 | Di-heme cytochrome c peroxidase                              | <i>Methylocystis sp. (strain SC2)</i>                                                                       |
| E6PV15_9ZZZZ    | 1 | Putative Cytochrome-c peroxidase                             | <i>mine drainage metagenome.</i>                                                                            |
| F1W1P5_9BURK    | 1 | Putative lipopro transmembrane                               | <i>Oxalobacteraceae bacterium IMCC9480.</i>                                                                 |
| A0A0F5K4S6_9BUR | 1 | Cytochrome C peroxidase                                      | <i>Paraburkholderia andropogonis.</i>                                                                       |
| A0A0P0RC60_9BUR | 5 | Cytochrome c peroxidase                                      | <i>Paraburkholderia caribensis MBA4.</i>                                                                    |
| A0A0D5V466_9BUR | 3 | Cytochrome c family protein                                  | <i>Paraburkholderia fungorum.</i>                                                                           |
| A0A0D5VJA9_9BUR | 3 | Cytochrome c family protein                                  | <i>Paraburkholderia fungorum.</i>                                                                           |
| A0A069PP74_9BUR | 1 | Cytochrome C peroxidase                                      | <i>Paraburkholderia glathei.</i>                                                                            |
| A0A069PPD0_9BUR | 2 | Cytochrome C peroxidase                                      | <i>Paraburkholderia glathei.</i>                                                                            |
| A0A069PWJ7_9BUR | 1 | Cytochrome C peroxidase                                      | <i>Paraburkholderia glathei.</i>                                                                            |
| B1G872_9BURK    | 5 | Di-haem cytochrome c peroxidase                              | <i>Paraburkholderia graminis C4D1M</i>                                                                      |
| B2SZN9_PARPJ    | 2 | Di-haem cytochrome c peroxidase                              | <i>Paraburkholderia phytofirmans (strain DSM 17436 / LMG 22146 / PsJN)/Paraburkholderia graminis C4D1M.</i> |
| A0A0A6SXI5_9BUR | 1 | Cytochrome C peroxidase                                      | <i>Paraburkholderia sacchari.</i>                                                                           |
| I5CK89_9BURK    | 7 | Di-heme cytochrome c peroxidase                              | <i>Paraburkholderia terrae BS001</i>                                                                        |
| A0A135HVF1_9RHI | 1 | Cytochrome C                                                 | <i>Paramesorhizobium deserti.</i>                                                                           |

|                   |    |                                                         |                                                                                 |
|-------------------|----|---------------------------------------------------------|---------------------------------------------------------------------------------|
|                   |    | peroxidase                                              |                                                                                 |
| A0A0Q6WL78_9BUR   | 1  | Uncharacterized protein                                 | <i>Pelomonas sp. Root1237.</i>                                                  |
| A0A147GSL5_9BUR   | 1  | Cytochrome C peroxidase                                 | <i>Pseudacidovorax intermedius.</i>                                             |
| A0A0Q7TXK6_9RHI   | 1  | Cytochrome C peroxidase                                 | <i>Pseudolabrys sp. Root1462.</i>                                               |
| A0A0S4U2X0_RALS   | 2  | Putative cytochrome c peroxidase signal peptide protein | <i>Ralstonia solanacearum</i>                                                   |
| A0A0K1ZSS9_RALS   | 30 | Lipoprotein transmembrane                               | <i>Ralstonia solanacearum</i>                                                   |
| U3GIH0_9RALS      | 24 | Uncharacterized protein                                 | <i>Ralstonia sp. 5_2_56FAA.</i>                                                 |
| A0A0B1XXZ0_9RAL   | 2  | Cytochrome C peroxidase                                 | <i>Ralstonia sp. A12.</i>                                                       |
| S9T3C6_9RALS      | 2  | Cytochrome B6 IPutative signal peptide protein          | <i>Ralstonia sp. AU12-08.</i>                                                   |
| A0A117DSL5_9RAL   | 3  | Cytochrome c peroxidase protein                         | <i>Ralstonia sp. NT80.</i>                                                      |
| A0A0Q6M4W4_9BUR   | 1  | Cytochrome C peroxidase                                 | <i>Rhizobacter sp. Root29.</i>                                                  |
| J0D0D5_RHILT      | 10 | Cytochrome c peroxidase                                 | <i>Rhizobium leguminosarum</i><br><i>bv. trifolii WSM2297.</i>                  |
| J2WAK9_9RHIZ      | 6  | Cytochrome c peroxidase                                 | <i>Rhizobium sp. AP16.</i>                                                      |
| J1T9S4_9RHIZ      | 1  | Cytochrome c peroxidase                                 | <i>Rhizobium sp. CF142.</i>                                                     |
| A0A0U3LE31_9BUR   | 1  | Cytochrome C peroxidase                                 | <i>Roseateles depolymerans.</i>                                                 |
| A0A031HXI2_9SPH   | 1  | Cytochrome-c peroxidase                                 | <i>Sphingomonas sp. RIT328.</i>                                                 |
| A0A0D6MKR3_9PRO   | 1  | Cytochrome c peroxidase transmembrane protein           | <i>Tanticharoenia sakaeratisensis</i><br><i>NBRC 103193.</i>                    |
| A0A0D6MLR1_9PRO   | 1  | Cytochrome c peroxidase                                 | <i>Tanticharoenia sakaeratisensis</i><br><i>NBRC 103193.</i>                    |
| A0A074TA94_9RHO   | 1  | Cytochrome C peroxidase                                 | <i>Thioclava dalianensis.</i>                                                   |
| D6CMR6_THIA3      | 1  | Putative Cytochrome-c peroxidase                        | <i>Thiomonas arsenitoxydans</i><br><i>(strain DSM 22701 / CIP 110005 / 3As)</i> |
| A0A0K6HR77_9BUR   | 3  | Cytochrome c peroxidase                                 | <i>Thiomonas bhubaneswarensis</i>                                               |
| A0A0P8ZAA7_VARP   | 1  | Cytochrome B6                                           | <i>Variovorax paradoxus.</i>                                                    |
| A0A0P9AKB8_VARP   | 3  | Cytochrome C peroxidase                                 | <i>Variovorax paradoxus.</i>                                                    |
| J2KN89_9BURK      | 7  | Cytochrome c peroxidase                                 | <i>Variovorax sp. CF313.</i>                                                    |
| Q2SV64_BURTA BthB | 38 | Cytochrome C peroxidase                                 | <i>Burkholderia thailandensis</i>                                               |

Proteins listed represent individual nodes in Cluster IIIB. Representative protein is also associated with protein sequences which share 80% or more sequence identity.

| Protein | $K_M$ ( $\mu\text{M}$ ) | $k_{\text{cat}}$ ( $\text{s}^{-1}$ ) |
|---------|-------------------------|--------------------------------------|
| Wt      | $3.4 \pm 0.4$           | $5.3 \pm 1.5$                        |
| Y463H   | $1.9 \pm 0.9$           | $5.0 \pm 1.7$                        |
| Y463M   | $3.3 \pm 0.4$           | $6.4 \pm 0.8$                        |
| S257A   | $2.1 \pm 0.2$           | $6.0 \pm 0.1$                        |
| S257W   | $2.2 \pm 0.4$           | $3.5 \pm 0.3$                        |
| E277Q   | Nd                      | Nd                                   |

**Supplementary Table 2 |** Kinetic analysis of BthA and its variants as peroxidases. Assays were performed in 50 mM  $\text{NaH}_2\text{PO}_4$ , pH 6.5 with 3 mM ABTS as the electron source, using  $\text{H}_2\text{O}_2$  concentrations ranging from 0.3  $\mu\text{M}$  to 30  $\mu\text{M}$  and a final concentration of enzyme of 30 nM. Variants show similar kinetic parameters compared to Wt BthA. Kinetic parameters were determined from Michaelis-Menten fit of the data. Parameters represent average of three independent kinetic assays.

**Supplementary Table 3 | X-ray crystallographic data collection and refinement statistics**

|                                                     | NT BthA                                       |
|-----------------------------------------------------|-----------------------------------------------|
| <b>Data collection</b>                              |                                               |
| Space group                                         | P2 <sub>1</sub> 2 <sub>1</sub> 2 <sub>1</sub> |
| Cell dimensions                                     |                                               |
| <i>a</i> , <i>b</i> , <i>c</i> (Å)                  | 51.21, 84.78, 95.83                           |
| Resolution (Å)                                      | 50.00-1.54                                    |
| <i>R</i> <sub>sym</sub>                             | 9.9 (74.5) <sup>*</sup>                       |
| <i>&lt;I&gt;/&lt;σI&gt;</i>                         | 19.0 (2.22)                                   |
| Completeness (%)                                    | 99.6 (99.0)                                   |
| Redundancy                                          | 7.5 (5.3)                                     |
| <i>CC1/2</i>                                        | (0.745)                                       |
| <b>Refinement</b>                                   |                                               |
| Resolution (Å)                                      | 47.92-1.54                                    |
| No. reflections                                     | 62344                                         |
| <i>R</i> <sub>work</sub> / <i>R</i> <sub>free</sub> | 14.80/17.82                                   |
| No. atoms                                           |                                               |
| Protein                                             | 6274                                          |
| Heme                                                | 150                                           |
| Ligand/ion                                          | 36                                            |
| Water                                               | 587                                           |
| <i>B</i> -factors (Å <sup>2</sup> )                 |                                               |
| Protein                                             | 19.36                                         |
| Heme                                                | 11.03                                         |
| Ligand/ion                                          | 35.14                                         |
| Water                                               | 29.28                                         |
| R.m.s. deviations                                   |                                               |
| Bond lengths (Å)                                    | 0.009                                         |
| Bond angles (°)                                     | 1.092                                         |

\*Values in parentheses are for highest-resolution shell.



**Supplementary Table 4 | Plasmids and gene sequences used in this study**

| Name                             | Description                                                                                                                                                                                                                                                                                                                                                                                                                                                                                                                                                                                                                                                                                                                                                                                                                                                                                                                                                                                                                                                                                                                                                                                                                                                                                                                                                                                                                                                                                                                                                                                                                                                                                                                                                         | Reference  |
|----------------------------------|---------------------------------------------------------------------------------------------------------------------------------------------------------------------------------------------------------------------------------------------------------------------------------------------------------------------------------------------------------------------------------------------------------------------------------------------------------------------------------------------------------------------------------------------------------------------------------------------------------------------------------------------------------------------------------------------------------------------------------------------------------------------------------------------------------------------------------------------------------------------------------------------------------------------------------------------------------------------------------------------------------------------------------------------------------------------------------------------------------------------------------------------------------------------------------------------------------------------------------------------------------------------------------------------------------------------------------------------------------------------------------------------------------------------------------------------------------------------------------------------------------------------------------------------------------------------------------------------------------------------------------------------------------------------------------------------------------------------------------------------------------------------|------------|
| pETSN                            | OmpA cleavable periplasmic leader sequence, N-terminal Strep-tag and C-terminal 6x-His tag                                                                                                                                                                                                                                                                                                                                                                                                                                                                                                                                                                                                                                                                                                                                                                                                                                                                                                                                                                                                                                                                                                                                                                                                                                                                                                                                                                                                                                                                                                                                                                                                                                                                          | Ref 29     |
| pKR2                             | Insertion of BthA at position S69 into pETSN via EcoRI and XhoI restriction enzyme cut sites                                                                                                                                                                                                                                                                                                                                                                                                                                                                                                                                                                                                                                                                                                                                                                                                                                                                                                                                                                                                                                                                                                                                                                                                                                                                                                                                                                                                                                                                                                                                                                                                                                                                        | This Study |
| pKR4                             | Deletion of N-terminal Strep-tag and C-terminal 6x-His tag from pKR2                                                                                                                                                                                                                                                                                                                                                                                                                                                                                                                                                                                                                                                                                                                                                                                                                                                                                                                                                                                                                                                                                                                                                                                                                                                                                                                                                                                                                                                                                                                                                                                                                                                                                                | This Study |
| <i>bthA</i> gene codon optimized | <p>gtgaccggctcgtcggcgtagtagtgagcccgctcgtcagttctcagcagcactgaccgcactgca<br/> agcgtgaccgcafttgcctgggcccggcagcattaggtaccacacgtacacgtcgtaccgtgctgacc<br/> ctgagcaccattgtgctgccatgtggtgactggccgatgtgcaagtgcacatgcattagcaagcg<br/> gtccggcagccccgatgcaaccatagcacacatgcagcccgtcctgcaagcgcagcaagcagcac<br/> cagtcgatgaatccgacaagtacacctggcgcagcggctccggcacacgcaaaagcagcattagatg<br/> ccgcacgcgcaaaagccgcaccgcctagtcggccgacaaccgttctgtfaccgggtgccccgcccga<br/> cgcgtgtgatacattggtcgcggcaccctcagggtgccagcaaatgaccgaccgcagccgtgt<br/> ttgccctgatccaccctggcagccctggtaagcgcgtgttcttcgatccggcctgagtgaccgcg<br/> cggatagactgtgccagctgccacgatcctggtcgcgcaattgcaccgacactgagcccggcgcact<br/> ggccggctccgctgtgcctcaaggtatgcgccggccatttagccgctaatgccccgagcctgct<br/> gtatgtgcctatgtccgctcgcatttctatcaggatgacgatgactggccccggcaccgttcggtg<br/> gtctgttagtgatgtgcgcccataccctggcagaacagttacgtggcccgtgttgatcctgatgaga<br/> tgaataatgcaagtccgcccactgatcgcaagatcgccgcacaggttaggtgccccttagccg<br/> gtcgttttgccctagcgttcgctgatccggaacgatggtgctgttctgggtgaagccatgcaagcc<br/> tatctgcagatgacgagatggcaccgttagcagccgttagcgcatacgtgaccaaacgcgaccct<br/> taaccccgcaggaatgcgcggtctggcactgttcgcaaccggacaaggttaactgcatgagctgcc<br/> acacactgagcgaccaccgaagtcggccgaacgcagcctgtaccgatttcggctatgacgccattg<br/> ccgtccgcgtaatcgtgcccttacctgccaatcgcgatccgcgtcactttgataacggctgtgcgataccg<br/> cagcaaaactgcgctggccggaacctacacagtggtgtgataatctcgtacccgggcttacgcaacg<br/> tggccatcaaggaaagtattatgacaatggtgttcgataccctgcgtgacgcagtgccattttacaatac<br/> ccgcagcaccgatccggcagcgtggtatcatggtcgcgatacctttgacgacgtgccgctgcctatcgt<br/> ggcaatgttaatgtgaacgacccccgatgaaccggccctggtacaccgctgcaatgaccgatgca<br/> gacgtggatgatctggtgcaatttctgcgtaccctgacagatgcccgttatgttgctgatgccgacagcc<br/> ccggacggtaaggcagcacgtcctaa</p> | This study |

**Supplementary Table 5 | Sequences of oligonucleotides used in this study**

| Name    | Sequence (5' → 3')                                    |
|---------|-------------------------------------------------------|
| pKR2-f  | CGAGACCGCGGTCCC GAATTCAAGCGGTCCGGCAGCCCCGG            |
| pKR2-r  | CCGGGGCTGCCGGACCGCTTGAATTCGGGACCGCGGTCTCG             |
| pKR3-f  | GCTACCGTAGCGCAGGCCGCTAGCAGCGGTCCGGCAGCCCCGGAT         |
| pKR3-r  | ATCCGGGGCTGCCGGACCGCTGCTAGCGGCCTGCGCTACGGTAGC         |
| pKR4-f  | GACGGTAAGGCAGCACGTCTTGAGATCCGGCTGCTAACAAAGCC          |
| pKR4-r  | GGCTTTGTTAGCAGCCGGATCTCAAGGACGTGCTGCCTTACCGTC         |
| E277Q-F | CGTGGCCCCGCTGTTTGTATCCTGATCAGATGAATAATGCAAGTGCCGCCGCA |
| E277Q-R | TGCGGCGGCACTTGCATTATTCATCTGATCAGGATCAAACAGCGGGCCACG   |
| Y463H-F | ACCCTGCGTCAGGCAGTGGCATTTCACAATACCCGCAGCACCGATCCGGCA   |
| Y463H-R | TGCCGGATCGGTGCTGCGGGTATTGTGAAATGCCACTGCGTCACGCAGGGT   |
| Y463M-F | ACCCTGCGTGACGCAGTGGCATTATGAATACCCGCAGCACCGATCCGGCA    |
| Y463M-R | TGCCGGATCGGTGCTGCGGGTATTCATAAATGCCACTGCGTCACGCAGGGT   |
| S257A-F | GCACCGTTCGGTGGTCTGTTTGCAGATGGTTCGCGCCGATACCCTG        |
| S257A-R | CAGGGTATCGGCGCGACCATCTGCAAACAGACCACCGAACGGTGC         |
| S257W-F | GCACCGTTCGGTGGTCTGTTTTGGGATGGTTCGCGCCGATACCCTG        |
| S257W-R | CAGGGTATCGGCGCGACCATCCCAAAACAGACCACCGAACGGTGC         |
| K444R-F | GTGGCCATCCGTGAAAGTTTTATGCACAATGGTGTGTTTCGATACCCTG     |
| K444R-R | AAAACTTTCACGGATGGCCACGTTGCGTAAGCCCCGGGGT              |
| K444E-F | GTGGCCATCGAAGAAAGTTTTATGCACAATGGTGTGTTTCGATACCCTG     |
| K444E-R | AAAACTTTCTTCGATGGCCACGTTGCGTAAGCCCCGGGGT              |
| K444Q-F | GTGGCCATCCAGGAAAGTTTTATGCACAATGGTGTGTTTCGATACCCTG     |
| K444Q-R | AAAACTTTCTTCGATGGCCACGTTGCGTAAGCCCCGGGGT              |
| gyrB-F  | ATCCGACGATCTTCCACATC                                  |
| gyrB-R  | CAGCACGTTTTTCGTTGTAGC                                 |
| bthA-F  | GTACCTGCAAAGCGACGAAATGG                               |
| bthA-R  | TGTGGCAGCTCATGCAGTTG                                  |
| phosA-F | CTGCAAAAACAGCCCGTGG                                   |
| phosA-R | ATCGAGGAAGCGGAACCAG                                   |

*Burkholderia thailandensis* E264 ( $\beta$ -proteobacteria)

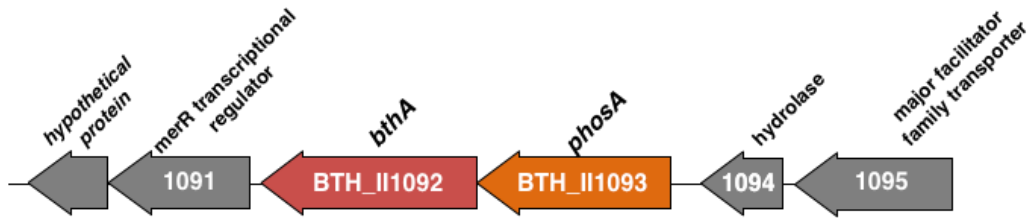

**Supplementary Figure 1** | Genomic context of *bthA* in *B. thailandensis*. Putative gene operon of *bthA* (BTH\_II1092) in *B. thailandensis* E264. *bthA* gene (red) is shown downstream of a potential protein partner (BTH\_II1093, orange) identified as a putative ser/thr protein phosphatase which we refer to as *phosA*. Other genes shown in the operon are labeled based on annotation of predicted function.

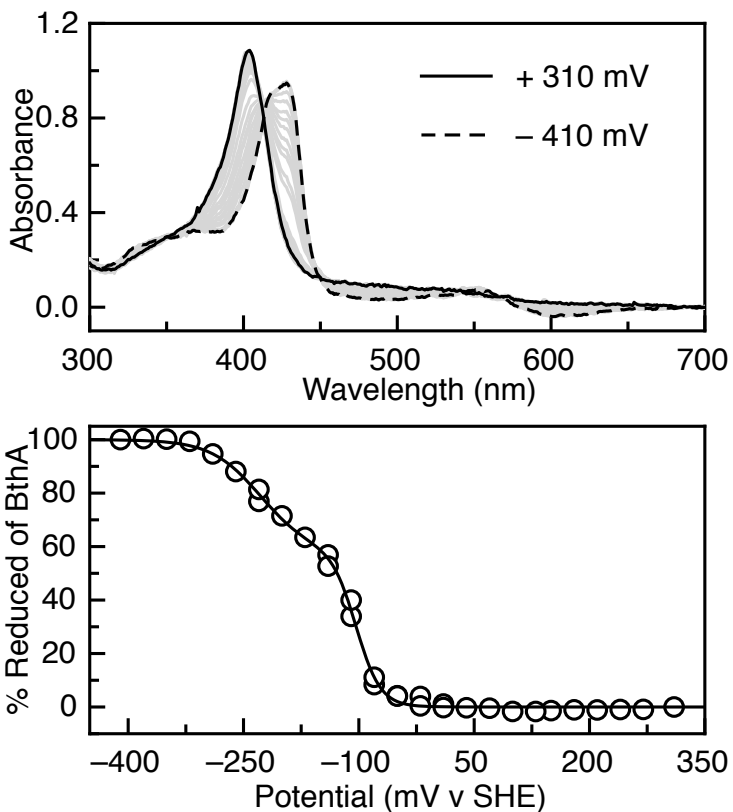

**Supplementary Figure 2** | Absorption Spectra of BthA from OTTLE Cell Titration. UV-Vis spectra were recorded for each set potential (top). As BthA was reduced, Soret shifted from 402 nm to 429 nm. Change in absorbance (bottom) was plotted versus recorded potential. Absorption scans were baseline corrected. Titration curve was fit to Nernst equation.

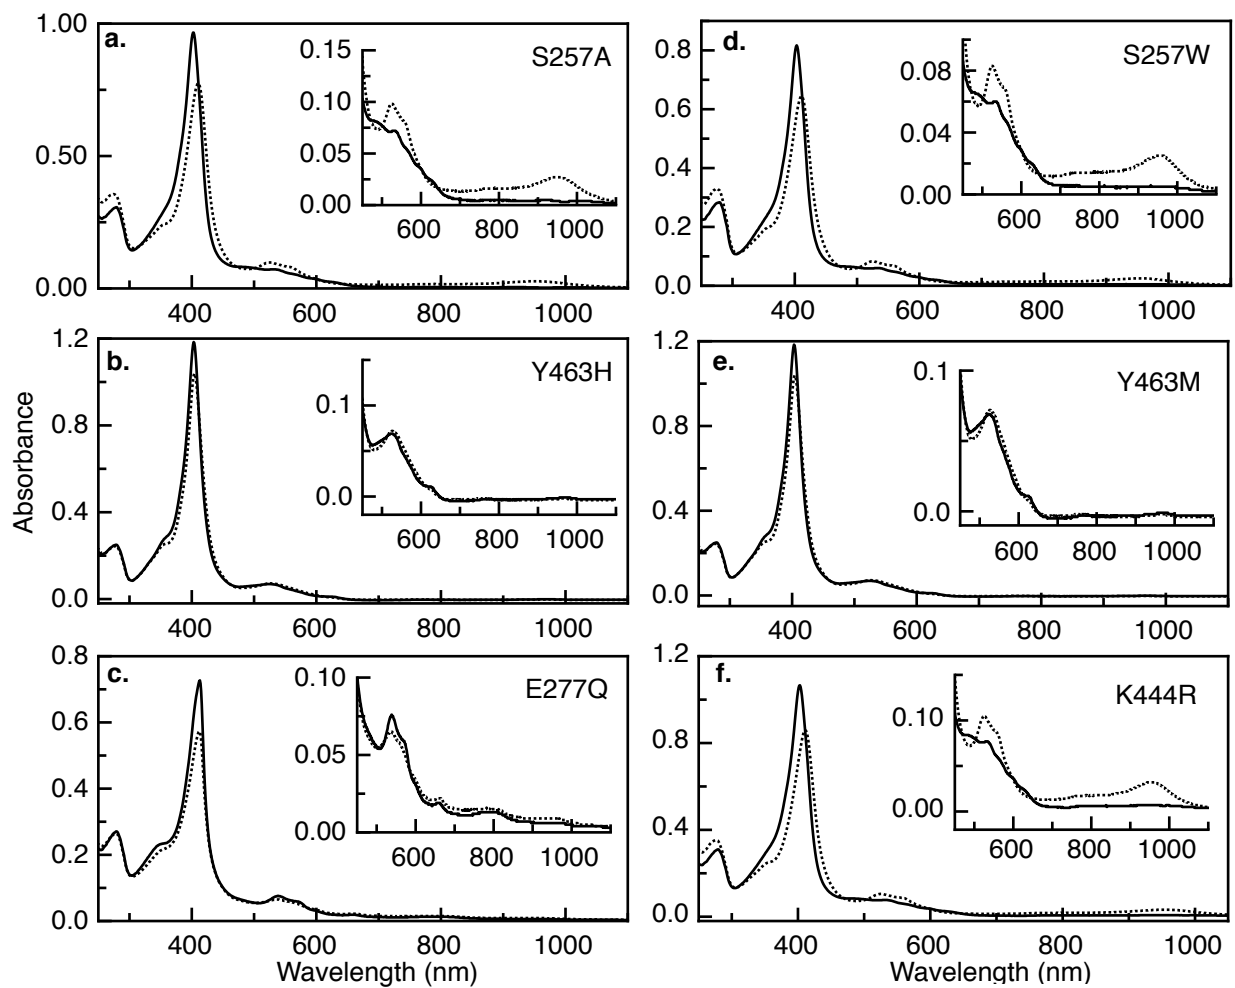

**Supplementary Figure 3 | NIR spectra of Variants.** Spectra for S257A (a), S257W (d) and K444R (f) were collected in 50 mM HEPES, 100 mM NaCl, 10% glycerol pH 7.8. For Y463H (b), E277Q (c) and Y463M (e) buffer used was 50 mM HEPES, pH 7.8. Protein spectra (5  $\mu$ M) were collected in the diferric state (solid line) before addition of 10 eq. H<sub>2</sub>O<sub>2</sub> (dotted line). K444R (5  $\mu$ M) produced a spectrum similar to Wt after addition of 1 eq. H<sub>2</sub>O<sub>2</sub>. Variants Y463H, Y463M and E277Q did not produce a feature at 960 nm as was observed for Wt (Figure 3).

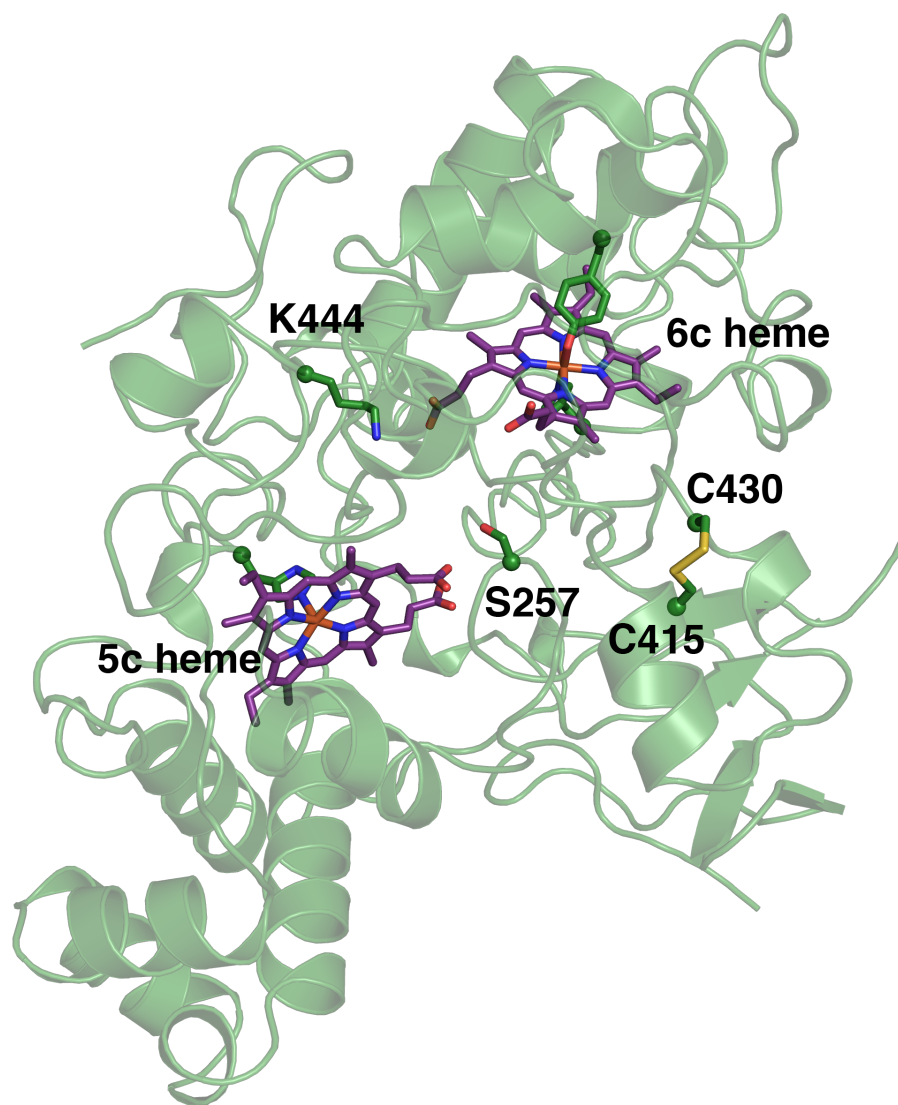

**Supplementary Figure 4 |** The structure of *B. thailandensis* BthA. Select regions of interest highlighted. Structure represented as in Figure 4.

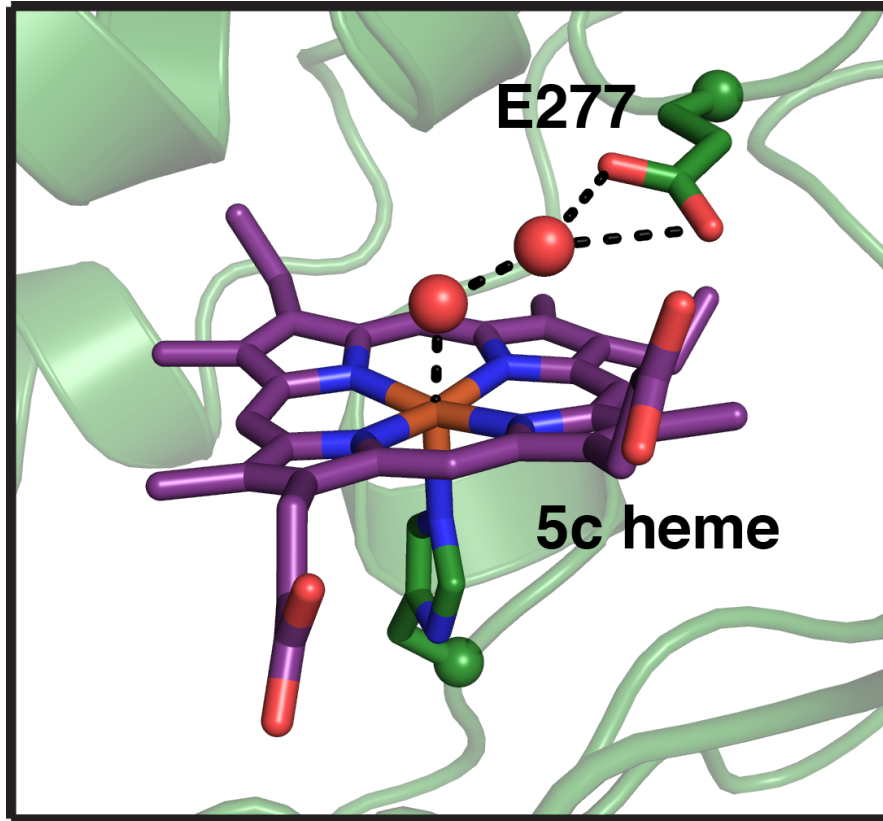

**Supplementary Figure 5** | E277 is positioned for acid-base catalysis at the 5c heme. BthA represented as in Figure 4.

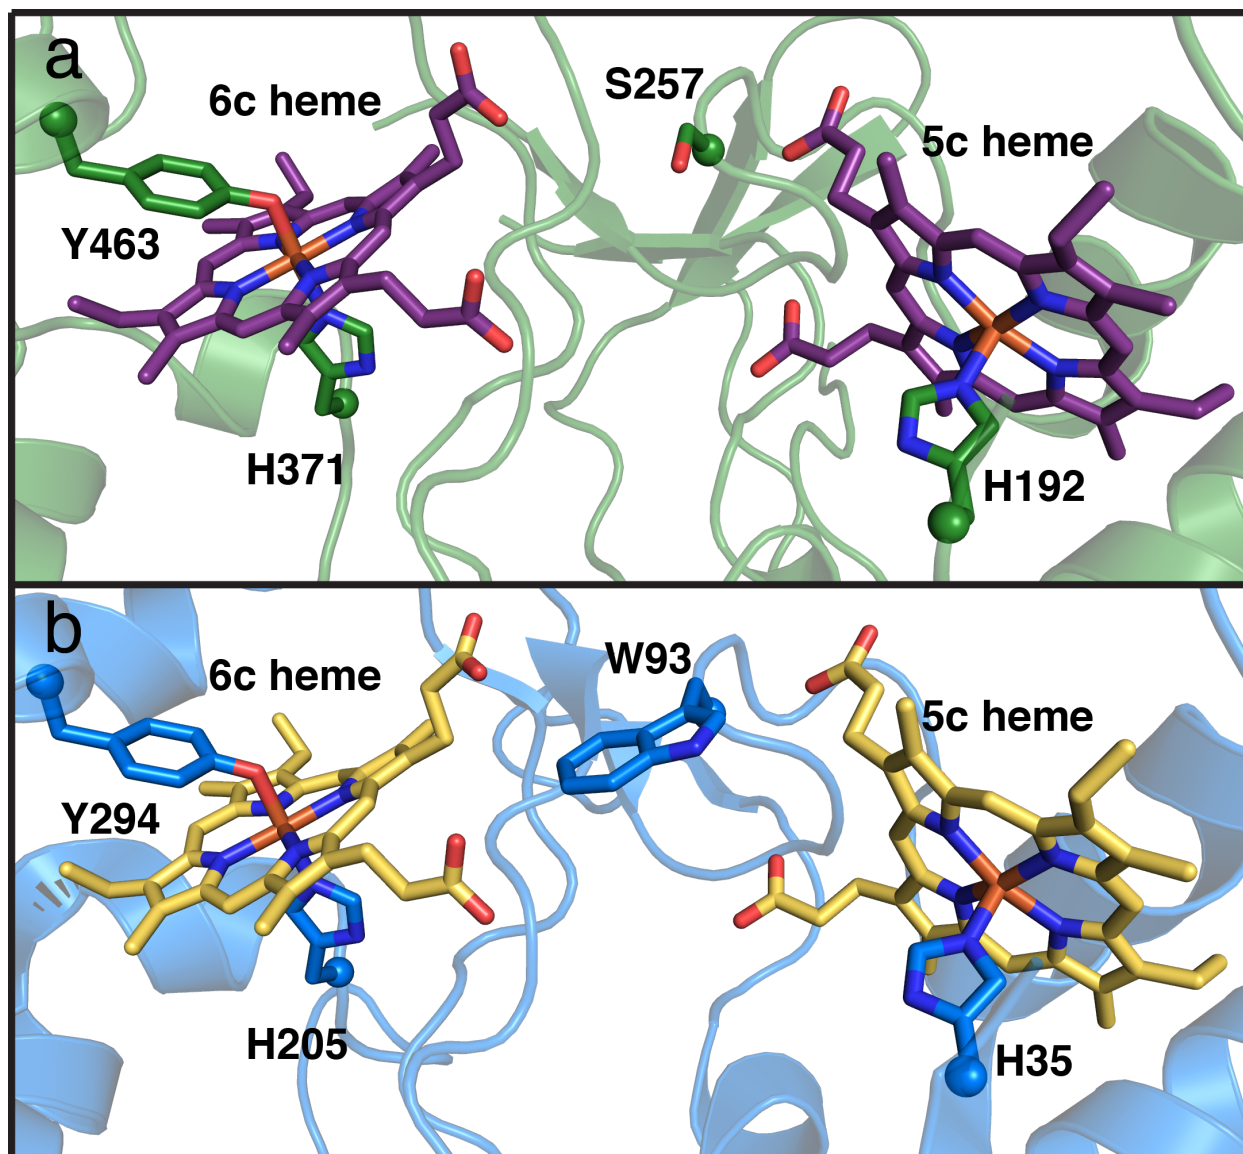

**Supplementary Figure 6** | BthA lacks a conserved interheme tryptophan. a) In BthA, as shown in Figure 4a, Ser257 is positioned between the 5c and 6 hemes. b) In MauG, there is a conserved tryptophan residue to mediate interheme electron transfer. BthA represented as in Figure 4. MauG peptide and heme carbon shown in marine and yellow, respectively. MauG peptide backbone shown in cartoon and side chains shown in stick representation.

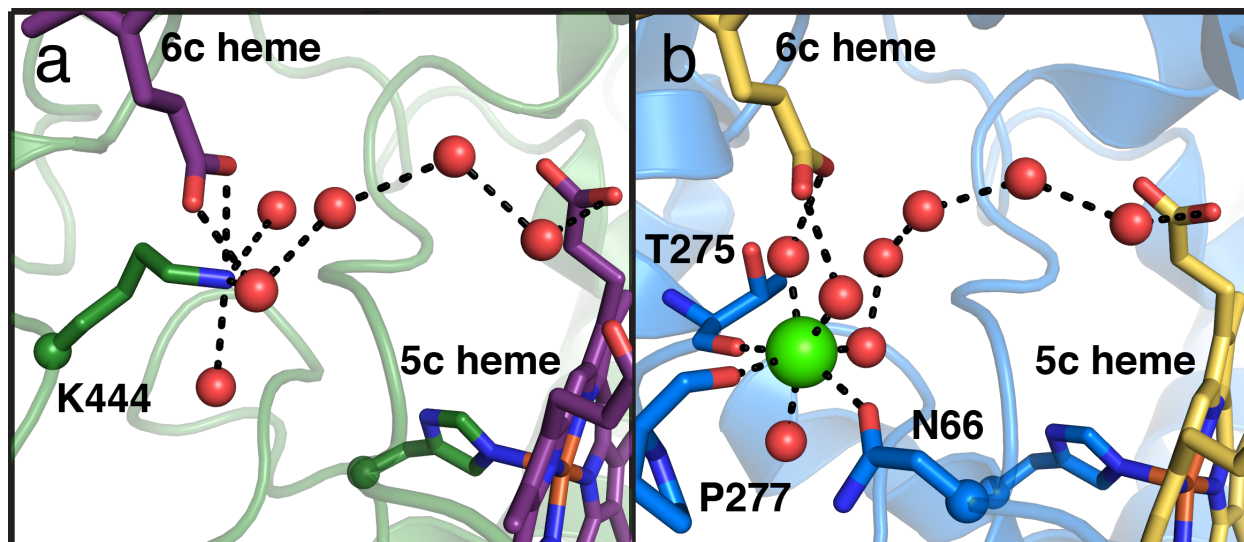

**Supplementary Figure 7** | A conserved ordered water network between 5c and 6c hemes. a) In BthA K444 mediates an ordered water network between the two heme propionate groups. b) In MauG (PDB 3L4M), a protein-coordinated calcium mediates a similar network. BthA represented as in Figure 4. MauG represented as in Figure S6. Calcium shown in light green.



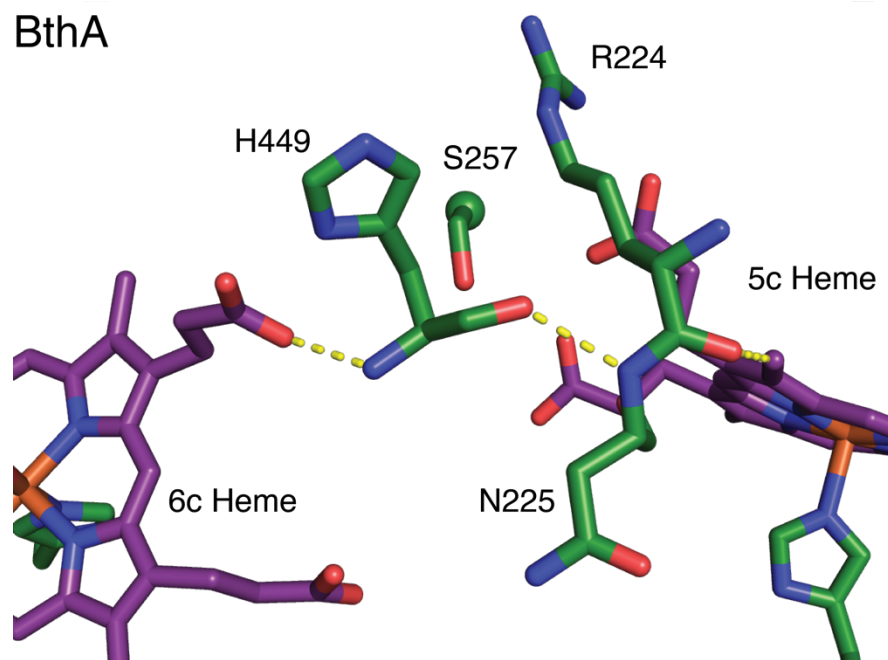

**Supplementary Figure 8 |** Alternate electron transfer residues involved in ET between 6c and 5c hemes as predicted by HARLEM. Interheme electron transfer pathway predicted by HARLEM/PATHWAYS for BthA, assuming a single step of ET from the 6c heme to the 5c heme. Through-space electron jumps denoted by yellow dashes.
